# Supplementary material
Source: HighWire-hosted journal article supplement (https://www.cmaj.ca/highwire/filestream/57957/field_highwire_adjunct_files/0/frac-ioannidis-app_1.pdf)
Supplement: frac-ioannidis-app_1.pdf [file frac-ioannidis-app_1.pdf]

Appendix 1 (as supplied by the authors): Associations between other participant characteristics and death, expressed as crude hazard ratios and 95% CI†

|                                                               | Combined                 | Men                      | Women                    |
|---------------------------------------------------------------|--------------------------|--------------------------|--------------------------|
| <b>Medications</b>                                            |                          |                          |                          |
| Hormone replacement therapy use                               | NA                       | NA                       | 0.80 (0.58, 1.10)        |
| Corticosteroid use                                            | 1.64 (0.81, 3.29)        | 2.61 (0.82, 8.27)        | 1.48 (0.61, 3.57)        |
| Bisphosphonate use                                            | 0.94 (0.57, 1.55)        | 1.75 (0.24, 12.64)       | 1.07 (0.64, 1.80)        |
| <b>Anthropometric/demographic</b>                             |                          |                          |                          |
| Weight ( kg)                                                  | <b>1.01 (1.00, 1.01)</b> | <b>0.99 (0.98, 0.99)</b> | 1.00 (0.99, 1.01)        |
| Height (every 10cm)                                           | <b>1.17 (1.07, 1.28)</b> | 0.84 (0.70, 1.01)        | 0.95 (0.80, 1.12)        |
| Age (years)                                                   | <b>0.93 (0.88, 0.99)</b> | 0.94 (0.86, 1.03)        | <b>0.93 (0.87, 0.99)</b> |
| Education (no university)                                     | <b>1.62 (1.30, 2.03)</b> | <b>1.51 (1.11, 2.05)</b> | <b>2.15 (1.53, 3.02)</b> |
| Sex (Women)                                                   | 0.59 (0.50, 0.69)        | --                       | --                       |
| <b>Prevalent fracture status</b>                              |                          |                          |                          |
| Minimal trauma clinical fracture                              | 0.96 (0.79, 1.16)        | 0.81 (0.51, 1.27)        | 1.15 (0.92, 1.43)        |
| Morphometric vertebral fracture                               | 0.88 (0.70, 1.11)        | 0.89 (0.59, 1.33)        | 0.93 (0.71, 1.23)        |
| <b>Diseases and surgeries‡</b>                                |                          |                          |                          |
| Number of diseases                                            |                          |                          |                          |
| 0                                                             | 1                        | 1                        | 1                        |
| 1                                                             | 0.95 (0.74, 1.22)        | 1.02 (0.69, 1.51)        | 0.94 (0.68, 1.32)        |
| 2                                                             | 1.26 (0.98, 1.62)        | <b>1.82 (1.25, 2.65)</b> | 1.11 (0.79, 1.54)        |
| 3                                                             | <b>1.44 (1.10, 1.90)</b> | <b>2.00 (1.30, 3.08)</b> | 1.33 (0.93, 1.90)        |
| 4+                                                            | <b>2.10 (1.59, 2.77)</b> | <b>2.86 (1.77, 4.63)</b> | <b>2.09 (1.47, 2.98)</b> |
| Prior surgeries                                               |                          |                          |                          |
| 0                                                             | 1                        | 1                        | 1                        |
| 1                                                             | 0.96 (0.8, 1.15)         | 1.20 (0.88, 1.64)        | 0.95 (0.75, 1.19)        |
| 2+                                                            | <b>1.56(1.16, 2.10)</b>  | 1.53 (0.84, 2.77)        | <b>1.70 (1.20, 2.41)</b> |
| <b>Health related habits</b>                                  |                          |                          |                          |
| Caffeine intake (100 mg/day)                                  | 1.01 (0.97, 1.04)        | 0.99 (0.94, 1.04)        | 0.99 (0.94, 1.04)        |
| Vitamin D intake (100 IU/day)                                 | 1.00 (0.99, 1.02)        | 1.02 (0.99, 1.05)        | 1.00 (0.99, 1.01)        |
| Calcium intake (100 mg/day)                                   | <b>0.97 (0.95, 0.99)</b> | 1.00 (0.96, 1.05)        | 0.98 (0.95, 1.01)        |
| Alcohol consumption (10 drinks/year)                          | <b>1.00 (1.00, 1.01)</b> | 1.00 (0.99, 1.01)        | 1.00 (0.99, 1.01)        |
| Regular activity (yes)                                        | <b>0.57 (0.49, 0.68)</b> | <b>0.56 (0.43, 0.73)</b> | <b>0.57 (0.46, 0.70)</b> |
| Current smokers (yes)                                         | <b>2.41 (1.98, 2.93)</b> | <b>1.83 (1.32, 2.54)</b> | <b>2.80 (2.20, 3.58)</b> |
| <b>Quality of life measures</b>                               |                          |                          |                          |
| Standardized Physical component SF-36 (every 10 point change) | <b>0.65 (0.63, 0.72)</b> | <b>0.64 (0.57, 0.72)</b> | <b>0.65 (0.59, 0.71)</b> |
| Standardized Mental component: SF-36 (every 10 point change)  | <b>0.90 (0.83, 0.99)</b> | 0.87 (0.74, 1.02)        | <b>0.90 (0.80, 0.99)</b> |

†NA = not applicable because HRT was not administered to men and was not included in the combined analysis. Values that are bolded represent statistically significant results.

‡Diseases included: rheumatoid arthritis, osteoarthritis, thyroid disease (hyperthyroidism, hypothyroidism), liver disease, scoliosis, breast cancer, uterine cancer, inflammatory bowel disease kidney disease hypertension, heart attack, stroke, neuromuscular disease (Parkinson's multiple, sclerosis, other), insulin dependent diabetes, non insulin dependent diabetes, kidney disease, phlebitis or thrombophlebitis, prostate cancer, Paget's disease. Prior surgeries included: parathyroid, thyroid, stomach, intestine, and gall bladder.
